# Supplementary material
Source: Elsevier journal article supplement (https://authors.library.caltech.edu/52013/8/mmc2.xlsx)
Supplement: mmc2 [file mmc2.xlsx]

## Sheet: Mass balance calculations
Summary of run information: pressure, temperature and duration of the experiments, and phase proportions in the run products
All the experiments are direct partial melting experiments of bulk compositions MBK and MBK+, except MBK+13, MBK+14, and Cryspho 2: MBK+13 and MBK+14 are
reversal experiments (of run MBK+6); Cryspho2 is a crystallisation experiment of phonolite gel +6 at high pressure. Three series of partial melting experiments
are summarized: in series I and III, the starting material is the fertile mantle composition MBK and the pressure is equal to respectively 1.3 and 1 GPa; in series IV,
the starting material is the K2O-enriched mantle composition MBK+ and the pressure is equal to 1.3 GPa. For the four experiments of series I, we used exactly the
same techniques as Laporte et al. (2004). For all the other experiments, we made an extra effort to minimize the amount of adsorbed water: all the pieces of the
piston-cylinder assemblies were fired at high temperature, and then stored at 150°C (see Lambart et al., 2009, for details).
The weight percentages of phases in the run products were calculated using a mass balance program modified from Albarède and Provost (1997). The "quality factor"
Q is a test for global data-uncertainties consistency: it should not be much greater than unity (Albarède and Provost, 1977).
In the cases where TiO2 was not analyzed in olivine and orthopyroxene, either TiO2 was not taken into account in the mass balance calculations or the TiO2 contents
measured in ol and opx at a slightly higher or a slightly lower temperature were used (the percentages obtained by these two techniques are equal within error).
Series I	T (°C)	P (GPa)	t (hours)	% liq	error	% ol	error	% opx	error	%cpx	error	% spl	error	% feldspar	error	Q
MBK4	1180	1.3	124.2	0.92	0.16	58.27	2.38	20.43	3.21	18.07	1.76	2.45	0.26	0	0	0.895
MBK3	1200	1.3	137.4	1.72	0.27	59.26	2.34	20.16	3.26	16.54	1.93	2.32	0.24	0	0	0.96
MBK2	1250	1.3	120	3.53	0.47	59.2	2.32	20.49	3.39	15.16	2.1	1.63	0.27	0	0	0.887
MBK1	1270	1.3	91	4.12	0.53	59.34	2.32	19.99	3.5	15.13	2.26	1.47	0.27	0	0	0.868
Series III	T (°C)	P (GPa)	t (hours)	% liq	error	% ol	error	% opx	error	%cpx	error	% spl	error	% feldspar	error	Q
MBK14	1190	1	103.1	0.86	0.36	61.26	2.73	19.36	3.44	13.56	2.07	2.1	0.35	2.78	1.1	0.686
MBK19 a	1200	1	101.7	1.51	0.46	60.29	2.63	20.19	3.43	13.93	2.06	2.2	0.28	1.9	0.96	0.568
MBK16	1220	1	93.1	3.03	0.78	61.42	2.68	18.52	3.67	13.78	2.25	1.69	0.3	1.56	1.15	0.585
MBK18	1240	1	100	5.42	0.66	60.27	2.44	19.51	3.54	13.09	2.15	1.77	0.27	0	0	0.758
MBK20	1260	1	92.8	12.68	1.03	60.46	2.45	18.82	3.73	7.43	2.43	0.55	0.23	0	0	0.34
Dun2	1290	1	71.9	16.83	1.1	61.58	2.58	16.99	4.07	4.15	2.75	0.42	0.19	0	0	0.478
MBK21	1310	1	75.7	22.83	1.26	62.24	2.48	14.68	3.12	0	0	0.09	0.24	0	0	0.315
Series IV	T (°C)	P (GPa)	t (hours)	% liq	error	% ol	error	% opx	error	%cpx	error	% spl	error	% feldspar	error	Q
MBK+7 b	1130	1.3	139.2	0	0	54.84	2.24	22.67	3.71	19.85	2.2	2.6	0.38	0	0	1.02
MBK+6	1150	1.3	142.5	1.64	0.28	56.56	2.41	21.44	3.38	18.04	1.89	2.28	0.3	0	0	0.885
MBK+5	1180	1.3	99.4	2.19	0.36	55.29	2.41	22.14	3.63	18.42	2.24	2.09	0.32	0	0	0.762
MBK+4	1200	1.3	94.1	2.56	0.39	57.42	2.4	19.74	3.52	18.08	2.14	2.28	0.31	0	0	0.879
MBK+3	1220	1.3	101.7	3.07	0.44	56.58	2.37	21.47	3.58	16.66	2.25	2.23	0.26	0	0	0.919
MBK+2	1240	1.3	94.8	3.68	0.52	57.55	2.43	20.24	3.65	16.49	2.32	2.03	0.27	0	0	1.039
MBK+1	1250	1.3	93.8	5.04	0.64	57.08	2.56	20.79	4.11	15.33	2.6	1.78	0.33	0	0	1.028
MBK+14	1180	1.3	168.8	14.85	1.76	51.24	2.58	8.61	3.94	15.38	2.23	1.67	0.24	8.24	2.55	0.114
MBK+13	1200	1.3	150.2	21.66	0.56	47.26	2.04	12.86	3.78	16.71	2.56	1.44	0.28	traces		0.577
Cryspho	T (°C)	P (GPa)	t (hours)	% liq	error	% ol	error	% opx	error	%cpx	error	% spl	error	% feldspar	error	Q
Cryspho2	1150	1	144	93.18	0.94	0.11	0.65	0	0	6.82	1.19	0	0	0	0	0.325
a Olivine analyses in MBK19 being slightly deficient in silica, the composition of ol in MBK14 was used instead in the mass balance calculations.
b For MBK+7, we assumed that liquid was absent and we did not take K2O and MnO into account in the mass balance calculations.

## Sheet: Phase compositions
Composition tables. Phase compositions in all the experiments are given in the following sheets. All the analyses are normalised to a sum of 100 wt %. The analytical total
before normalisation is given in the line "Total"; the error on the total is the standard deviation of the n analytical totals.
For each oxide in each phase, the error is either the standard deviation of the n electron microprobe analyses (n is the number of analyses for a given phase)
or the 1-s analytical uncertainty (from the counting statistics of the electron microprobe), whichever is greater.
Mg# and Cr# are the average molar ratios Mg/(Mg+Fe) and Cr/(Cr+Al), respectively; the errors on Mg# and Cr# are the standard deviations of the n microprobe analyses.
Plagioclase. For the interstitial plagioclase in samples MBK15, MBK14, MBK19, and MBK16, it was difficult to obtain uncontaminated electron microprobe analyses because
the large grains are poekilitic.Thus, the few 0.1 wt. % of MgO in the mean compositions of interstitial plagioclase are presumably due to contamination. Plagioclase crystals
found in the microdikes are devoid of inclusions and yield analyses of better quality. They are systematically slightly more sodic and less calcic than the interstitial plagioclase.
Spinel. Most spinel grains are too small to be analysed with the electron microprobe, and even the largest grains yield analyses contaminated by the neighbouring phases,
as shown by SiO2 concentrations of a few wt.%. In most cases, spinel analyses with more than 0.3 wt.% SiO2 were discarded. In MBK21, spinel is present as traces, and we
could only get one analysis with 1.55 wt.% SiO2.

## Sheet: MBK1
MBK1: Direct partial melting experiments with composition MBK at 1.3 GPa-1270°C
Nice dykes, 10-15 microns thick (specially the dyke in the graphite cap)
Very small difference in composition between top and bottom dykes
	Glass MBK 1 (top)		Glass MBK 1 (bottom)		Ol MBK1		Opx MBK1		Sp MBK1		Cpx MBK1
	5 mm		5 mm
	mean	error	mean	error	mean	error	mean	error	mean	error	mean	error
	n = 6		n = 4		n = 7		n = 8		n = 3		n = 8
Na2O*	4.73929	0.178162	4.49758	0.0941792					0.0229387	0.0179839	0.833898	0.0389156
MgO*	8.75281	0.218908	9.05515	0.226469	48.2616	0.242693	30.6686	0.195424	21.2177	0.147002	18.6022	0.364629
K2O*	1.14904	0.0288709	1.03961	0.0872755
CaO*	8.96893	0.324765	9.09315	0.329263	0.251421	0.0241252	1.96294	0.117451	0.0921003	0.0193749	16.3481	0.616093
TiO2*	1.02238	0.104252	0.928451	0.0946741			0.183987	0.0329933	0.171139	0.0326062	0.346931	0.037766
FeO*	5.90098	0.256457	6.11106	0.265587	10.1548	0.13996	6.32929	0.112154	9.34123	0.199171	4.19512	0.199368
MnO*	0.118081	0.106273	0.10368	0.0933118	0.157607	0.0311501	0.127923	0.0325756	0.0833095	0.0304314	0.124084	0.0377856
Cr2O3*	0.0361257	0.0425709	0.0759283	0.0683354	0.0781539	0.0328149	0.67294	0.0853094	11.6834	1.10685	0.907857	0.0554156
SiO2*	50.6508	0.271488	50.908	0.306423	41.0186	0.24577	53.5458	0.331496	0.265507	0.0450944	51.4564	0.256702
Al2O3*	18.6616	0.162542	18.1874	0.163436	0.0778423	0.0191044	6.50851	0.151843	57.1227	1.23534	7.18538	0.236919
Total	98.505	0.605553	98.4133	0.563591	99.8203	0.427024	99.3512	0.343241	98.777	0.266753	99.8351	0.508536
mg#	72.5575	0.33996	72.5331	0.663609	89.4423	0.0935675	89.6235	0.127048	80.1935	0.43475	88.7745	0.316964
cr#							6.47419	0.676186	12.0716	1.23776	7.81919	0.379899
	Ol MBK1
	with NiO and TiO2
Ol	mean	1-s*
	n = 5
MgO	48.1869	0.0853874
CaO	0.248115	0.0193251
TiO2	0.0237183	0.0217213
FeO	10.1237	0.0980989
MnO	0.150358	0.0169223
NiO	0.29695	0.0279613
Cr2O3	0.0746862	0.01131
SiO2	40.8245	0.129701
Al2O3	0.0710763	0.00828843
Total anal.	99.622	0.25347
mg#	89.4567	0.0912695
cr#
*: standard deviation of the n electron microprobe analyses

## Sheet: MBK2
MBK2: Direct partial melting experiments with composition MBK at 1.3 GPa-1250°C
Ol has a slightly lower mg# in the top of the sample than in the bottom
	Glass MBK2 (bottom)		Ol MBK2		Ol MBK2	Opx MBK2		Sp MBK2		Cpx MBK2
	5 mm		bottom		top	bottom		bottom		bottom
	mean	error	mean	error		mean	error	mean	error	mean	error
	n = 8		n = 5		#1	n = 7		n = 4		n = 6
Na2O*	5.17877	0.114811						0.0177685	0.0182957	0.916922	0.0526382
MgO*	8.2263	0.20574	48.1626	0.242485	47.884	30.7717	0.183378	21.2754	0.218474	18.3171	0.193054
K2O*	1.36388	0.0468834
CaO*	8.39694	0.304053	0.224724	0.0233477	0.216493	1.96163	0.200406	0.0448361	0.020921	16.7107	0.261577
TiO2*	0.931079	0.0949421	0.0170345	0.0278923	n.a.	0.157499	0.0321939	0.180564	0.0328903	0.34329	0.0376626
FeO*	5.50658	0.239316	10.2331	0.14049	10.4086	6.27128	0.156716	9.19094	0.133364	4.03301	0.0957223
MnO*	0.117305	0.105574	0.137534	0.0438335	0.184568	0.14117	0.0309102	0.104587	0.0515857	0.131451	0.0367016
Cr2O3*	0.0425722	0.038315	0.0761916	0.0327542	0.0788156	0.650198	0.075356	11.0955	0.482253	0.927253	0.0744349
SiO2*	51.4963	0.27602	41.0823	0.246054	41.1387	53.8242	0.422857	0.224729	0.0230836	51.4926	0.268788
Al2O3*	18.7402	0.163228	0.0665594	0.0189762	0.0887922	6.22231	0.386183	57.8657	0.357395	7.1277	0.171216
Total	97.4471	0.430421	99.988	0.142552	100.234	100.06	0.352917	98.1552	0.621212	99.7153	0.420677
mg#	72.6998	0.613794	89.35	0.135204	89.131	89.7407	0.21397	80.4921	0.214709	89.0068	0.190615
cr#			43.0658	3.95938	37.3223	6.55556	0.663737	11.3969	0.489889	8.0197	0.495856
Olivine analyses with NiO
	Ol MBK2
	bottom
	mean	1-s*
	n = 5
MgO	48.0566	0.0687481
CaO	0.224229	0.00811022
TiO2	0.0169931	0.0174978
FeO	10.2106	0.135022
MnO	0.137228	0.043727
NiO	0.220026	0.031137
Cr2O3	0.076024	0.0174542
SiO2	40.9919	0.0713125
Al2O3	0.0664122	0.00596685
Total anal.	99.988	0.142552
mg#	89.35	0.135204
cr#	43.0658	3.95938
*: standard deviation of the n electron microprobe analyses

## Sheet: MBK3
MBK3: Direct partial melting experiments with composition MBK at 1.3 GPa-1200°C
	Glass MBK3 (bottom)		Ol MBK3		Opx MBK3		Sp MBK3		Cpx MBK3
	5 mm
	mean	error	mean	error	mean	error	mean	error	mean	error
	n = 3		n = 4		n = 6		n = 3		n = 7
Na2O*	7.16027	0.248181					0.0107971	0.0178325	1.19748	0.0824981
MgO*	5.54011	0.138558	48.0753	0.242299	31.0738	0.258655	21.4168	0.147761	17.3797	0.537025
K2O*	2.63256	0.0641554
CaO*	5.3761	0.194669	0.184229	0.0221542	1.7011	0.291957	0.0906911	0.0338465	17.2904	0.664323
TiO2*	0.862379	0.0879368	0.021734	0.0324993			0.183091	0.0329663	0.434643	0.040202
FeO*	3.96664	0.17239	10.327	0.141123	6.31682	0.112052	9.29379	0.134075	3.73512	0.0872376
MnO*	0.070816	0.0637344	0.113458	0.0306654	0.153336	0.0310792	0.101491	0.030586	0.127347	0.0307694
Cr2O3*	0.0384107	0.0350876	0.092269	0.0332505	0.449283	0.0484792	9.97107	0.296445	0.772394	0.0599972
SiO2*	54.0262	0.489462	41.1243	0.246242	54.8576	0.221684	0.24953	0.0551054	52.0457	0.282435
Al2O3*	20.3265	0.177044	0.0616528	0.0287248	5.44802	0.287855	58.6828	0.255745	7.01713	0.256612
Total	96.7067	0.679569	99.1983	0.14064	100.773	0.207709	98.8587	0.0603517	100.876	0.215768
mg#	71.3467	0.166548	89.2454	0.0648711	89.763	0.0573129	80.4223	0.196325	89.2373	0.200711
cr#					5.26381	0.702672	10.2323	0.307859	6.87364	0.425652
Mean Ol compo with NiO
	Ol MBK3
	mean	1-s*
	n = 4
MgO	47.9426	0.0783511
CaO	0.18372	0.00840836
TiO2	0.0216749	0.0324133
FeO	10.2985	0.0795026
MnO	0.113142	0.0247967
NiO	0.27594	0.021805
Cr2O3	0.0920197	0.0329037
SiO2	41.0108	0.11212
Al2O3	0.0614801	0.0286356
Total anal.	99.1983	0.14064
mg#	89.2454	0.0648711
cr#	50.8964	18.3492
*: standard deviation of the n electron microprobe analyses

## Sheet: MBK4
MBK4: Direct partial melting experiments with composition MBK at 1.3 GPa-1180°C
Glass compositions were measured with a 2-mm beam size and were corrected for sodium loss (before normalisation, Na2O is multiplied by 1,04 ; then the analysis is normalised to a total of 100 %).
The correction factor for Na2O is based on systematic measurements of glass compositions at 2 and 5 mm for a set of glasses with Na2O concentrations ranging from 2,9 to 7,5 wt %.
The correction factor is equal to 1,04 for Na2O concentrations of 7-8 wt % and 1.02 for Na2O concentrations of 5 wt %; no correction is required for Na2O concentrations equal to 2-3 wt % .
	Glass MBK4		Olivine MBK4		Opx MBK4		Sp MBK4		Cpx MBK4
	2 mm
	mean	error	mean	error	mean	error	mean	error	mean	error
	n = 6		n = 4		n = 5		n = 3		n = 3
Na2O*	8.04191	0.549364					0	0.0172409	1.37142	0.0717199
MgO*	3.49538	0.0874195	48.5722	0.243328	31.4438	0.185966	21.3093	0.147351	17.291	0.630993
K2O*	4.74572	0.115653
CaO*	3.41483	0.123651	0.176164	0.0354855	1.47245	0.133717	0.0722338	0.0248304	17	0.53935
TiO2*	0.673744	0.0687017			0.128798	0.0341951	0.143831	0.0386491	0.479345	0.0849814
FeO*	2.70035	0.156636	10.1702	0.140065	6.32622	0.112129	9.64626	0.136499	3.84736	0.0885179
MnO*	0.0510937	0.0675081	0.145664	0.0309671	0.140957	0.0309076	0.110412	0.0306452	0.133534	0.0308266
Cr2O3*	0.0185545	0.0210715	0.0431725	0.0317272	0.468989	0.052598	9.80771	0.20259	0.712637	0.0506118
SiO2*	55.7049	0.353784	40.8402	0.244974	54.8383	0.369653	0.306248	0.0752855	51.8957	0.236185
Al2O3*	21.1535	0.184247	0.0523505	0.0188146	5.18047	0.429513	58.604	0.45413	7.26897	0.617448
Total	90.0772	3.25838	100.757	0.14225	100.414	0.45496	98.7333	0.110192	100.605	0.231733
mg#	69.7779	1.1793	89.4884	0.0636678	89.858	0.0901925	79.7483	0.123952	88.8954	0.345976
cr#					5.71676	0.258963	10.0945	0.258328	6.21054	0.852449

## Sheet: MBK+1
MBK+1: Direct partial melting experiments with composition MBK+ at 1.3 GPa-1250°C
Opx : the analyses are homogeneous, except for CaO which ranges from 1,7 up to 2,7.
	Glass MBK+1 (bottom)		Ol MBK+1		Opx MBK+1		Sp MBK+1		Cpx MBK+1
	5 mm
	mean	error	mean	error	mean	error	mean	error	mean	error
	n = 7		n = 7		n = 8		n = 3		n = 6
Na2O*	4.74423	0.0993442		0			0.0138487	0.0176907	0.79242	0.0380501
MgO*	8.01117	0.200359	48.1896	0.242542	30.7317	0.358894	21.277	0.265262	18.5139	0.499911
K2O*	2.17746	0.0626119		0
CaO*	8.16277	0.295574	0.216806	0.0263126	2.13676	0.409034	0.0569812	0.0182917	16.6012	0.684454
TiO2*	0.893491	0.0911093		0.0273669		0.0273669	0.134544	0.0314973	0.369306	0.0419945
FeO*	5.42773	0.235889	10.3092	0.145345	6.22873	0.12117	9.31394	0.222506	4.12721	0.18817
MnO*	0.0869296	0.0782367	0.152891	0.0367344	0.163518	0.0312586	0.106594	0.0385432	0.106061	0.0306166
Cr2O3*	0.0397663	0.0357897	0.0838592	0.0357182	0.618264	0.055884	11.8948	1.73113	0.825417	0.0753587
SiO2*	51.5139	0.276115	40.9742	0.245572	54.015	0.218149	0.185152	0.0225201	51.7284	0.308506
Al2O3*	18.9425	0.164989	0.0733654	0.0190536	6.10605	0.348782	57.0172	1.69145	6.93609	0.204809
Total	97.3317	0.597802	99.6853	0.158873	100.145	0.463758	98.8377	0.292185	100.266	0.700488
mg#	72.4631	0.748405	89.2847	0.147297	89.7907	0.152577	80.2824	0.568848	88.8868	0.303925
cr#					6.36053	0.464626	12.287	1.88037	7.39113	0.611268

## Sheet: MBK+2
MBK+2: Direct partial melting experiments with composition MBK+ at 1.3 GPa-1240°C
The best glass analyses come from a nice dike in the lid at the top of the graphite container; for comparison, we made a few glass analyses in a dike at the bottom of the container
The MgO content in the glass is slightly larger at the bottom than at the top of the container (but well within 2-s); the concentrations of the other oxides are similar at the top and at the bottom
	Glass MBK+2 (top)		Glass MBK+2 (bottom)		Ol MBK+2		Opx MBK+2		Opx in dike	Sp MBK+2		Cpx MBK+2
	5 mm		5 mm
	mean	error	mean	error	mean	error	mean	error		mean	error	mean	error
	n = 7		n = 3		n = 7		n = 6		#1	n = 3		n = 5
Na2O*	5.31094	0.111211	5.31469	0.11129						0	0.0172409	0.943835	0.0463674
MgO*	6.54701	0.163741	6.89133	0.172352	48.0311	0.242204	30.7004	0.183104	30.7207	21.6284	0.148566	17.7711	0.628847
K2O*	2.95015	0.0725572	2.85224	0.0695092
CaO*	6.88829	0.249425	7.0688	0.255961	0.222298	0.0232766	1.89517	0.163369	1.56052	0.0403024	0.0196861	17.2405	0.619953
TiO2*	0.908143	0.0926033	0.892934	0.0910525						0.172341	0.0326425	0.393702	0.0390783
FeO*	4.79144	0.208236	4.68293	0.20352	10.4099	0.141682	6.41456	0.112848	6.26121	9.28924	0.134044	3.8951	0.130871
MnO*	0.106659	0.0959934	0.129212	0.116291	0.147803	0.0309965	0.130944	0.0308016	0.190405	0.0988532	0.0305676	0.119484	0.0310432
Cr2O3*	0.0241298	0.0217168	0.0530939	0.0477845	0.0535431	0.0320509	0.573419	0.0470034	0.504725	10.585	0.190898	0.772722	0.0639766
SiO2*	52.7401	0.282687	52.7173	0.304821	41.0654	0.245979	54.1138	0.218539	53.4988	0.139192	0.035736	51.6947	0.251143
Al2O3*	19.7332	0.201932	19.3975	0.176237	0.0698923	0.0225381	6.1717	0.17886	7.26361	58.0467	0.256054	7.1689	0.229817
Total	97.504	0.644701	97.5217	0.355328	99.996	0.357242	100.046	0.254139	99.262	98.4433	0.130577	100.355	0.436184
mg#	70.8963	1.02212	72.4007	0.17489	89.1595	0.147685	89.5083	0.0838816	89.7395	80.5838	0.116506	89.0492	0.163511
cr#							5.87182	0.465329	4.45384	10.8998	0.211717	6.73898	0.434379

## Sheet: MBK+3
MBK+3: Direct partial melting experiments with composition MBK+ at 1.3 GPa-1220°C
	Glass MBK+3 (bottom)		Ol MBK+3		Opx MBK+3		Sp MBK+3		Cpx MBK+3
	5 mm
	mean	error	mean	error	mean	error	mean	error	mean	error
	n = 6		n = 6		n = 8		n = 3		n = 6
Na2O*	5.94944	0.124581					0.0136227	0.0176834	1.04409	0.0703975
MgO*	6.04682	0.151231	47.9981	0.242133	31.0571	0.184477	21.5165	0.160354	17.7936	0.693632
K2O*	3.43599	0.102502
CaO*	6.22476	0.225399	0.225738	0.0233773	1.82492	0.11608	0.0368001	0.0331256	17.3556	0.966971
TiO2*	0.866274	0.088334			0.180267	0.0328813	0.183197	0.0329695	0.372248	0.03848
FeO*	4.22267	0.183517	10.4477	0.141936	6.39488	0.112688	9.2458	0.133743	3.94379	0.16543
MnO*	0.0801111	0.0721	0.153208	0.0310771	0.135995	0.0308518	0.0900564	0.0304981	0.136582	0.0308581
Cr2O3*	0.0390499	0.0485663	0.0517654	0.0319955	0.54314	0.0461976	9.80637	0.199763	0.726502	0.0707193
SiO2*	53.1206	0.284726	41.0587	0.245949	53.8385	0.217468	0.200005	0.0642189	51.8411	0.210951
Al2O3*	20.0143	0.174324	0.0648199	0.0189564	6.02525	0.199755	58.9076	0.255316	6.78649	0.166878
Total	96.2452	0.417176	100.05	0.327812	99.9909	0.28534	97.7017	0.32818	100.11	0.385147
mg#	71.8511	0.241456	89.1178	0.0982399	89.6446	0.181944	80.5757	0.168195	88.9399	0.269443
cr#					5.69882	0.37121	10.0456	0.200219	6.69519	0.543286

## Sheet: MBK+4
MBK+4: Direct partial melting experiments with composition MBK+ at 1.3 GPa-1200°C
Nice dike at the bottom of the graphite container + dikes at the top; glass analyses at the top and at the bottom are equal
	Glass MBK+4 (bottom)		Ol MBK+4		Opx MBK+4		Sp MBK+4		Cpx MBK+4
	5 mm
	mean	error	mean	error	mean	error	mean	error	mean	error
	n = 6		n = 7		n = 8		n = 4		n = 5
Na2O*	6.35023	0.295376					0.00915168	0.0175385	1.04119	0.0718409
MgO*	4.89546	0.122436	48.0845	0.242319	31.0467	0.185122	21.036	0.148122	17.9505	0.373456
K2O*	4.11422	0.100264
CaO*	5.06422	0.183376	0.196964	0.0225313	1.66226	0.0561505	0.0563378	0.0210806	16.7267	0.243432
TiO2*	0.782053	0.0797459					0.156039	0.0321497	0.422112	0.0398606
FeO*	3.51906	0.152938	10.4242	0.157937	6.3889	0.11264	9.40797	0.202233	3.99784	0.105253
MnO*	0.0729999	0.0656999	0.133318	0.0308244	0.129361	0.0330326	0.107179	0.030624	0.138976	0.0308845
Cr2O3*	0.0194532	0.0325156	0.0485188	0.0369793	0.514	0.0524331	10.6266	1.49284	0.720312	0.0766249
SiO2*	54.66	0.292977	41.0487	0.245904	54.0674	0.2682	0.223458	0.031309	51.9924	0.330755
Al2O3*	20.5223	0.178749	0.06377	0.0237111	6.19128	0.308962	58.3773	1.6711	7.00991	0.329142
Total	96.292	0.738632	99.665	0.324378	99.9771	0.220398	98.4283	0.593635	100.158	0.427868
mg#	71.2635	0.829244	89.157	0.156108	89.6503	0.178458	79.9437	0.33505	88.8941	0.113319
cr#					5.28263	0.576904	10.8951	1.65216	6.4353	0.397638

[truncated: 14 more sheets: MBK+5, MBK+6, MBK+7, MBK+13, MBK+14, Cryspho 2, MBK15, MBK14, MBK19, MBK16, MBK18, MBK20, DUN2, MBK21]
